# Supplementary material for: Unveiling Complete Genome of Streptococcus agalactiae from Malaysian Aquaculture: A Closer Look at Molecular Characteristics and Phylogenomic
Source: Research Square preprint supplement (doi:10.21203/rs.3.rs-8133473/v1), 2025-12-22
Supplement: Supplementary file 1 [file 2299d65be8e2386d0a54122a.docx]

Table 1. Detail on virulence factor prediction

| **Start** | **End** | **Genes** | **Protein** | **Class** | **Function** |
| --- | --- | --- | --- | --- | --- |
| 34913 | 36577 | gbs0628 | major subunit protein | M | Cell wall/membrane/envelope biogenesis |
| 37591 | 38507 | gbs0630 | class C sortase | M | Cell wall/membrane/envelope biogenesis |
| 38464 | 39315 | gbs0631 | class C sortase | M | Cell wall/membrane/envelope biogenesis |
| 39397 | 42069 | gbs0632 | tip adhesin protein | M | Cell wall/membrane/envelope biogenesis |
| 51292 | 51597 | cylX | acetyl coenzyme A (CoA) carboxylase CylX | - | - |
| 51597 | 52445 | cylD | malonyl-CoA-ACP transacylase CylD | - | - |
| 52442 | 53164 | cylG | 3-ketoacyl-ACP-reductase CylG | I | Lipid transport and metabolism |
| 53157 | 53462 | acpC | acyl carrier protein AcpC | I | Lipid transport and metabolism |
| 53446 | 53922 | cylZ | 3R-hydroxymyristoyl ACP dehydratase CylZ | I | Lipid transport and metabolism |
| 53912 | 54841 | cylA | ABC (ATP-binding cassette) transporter CylA | J | Translation, ribosomal structure and biogenesis |
| 54834 | 55712 | cylB | ABC (ATP-binding cassette) transporter CylB | V | Defense mechanisms |
| 57709 | 58662 | cylF | putative aminomethyltransferase CylF | E | Amino acid transport and metabolism |
| 58659 | 60854 | cylI | putative 3-ketoacyl-ACP synthase CylI | I | Lipid transport and metabolism |
| 60859 | 62070 | cylJ | glycosyltransferase CylJ | G | Carbohydrate transport and metabolism |
| 62039 | 62614 | cylK | putative phosphopantetheinyl transferase CylK | - | - |
| 540364 | 541605 | neuA | CMP-N-acetylneuraminic acid synthetase NeuA | M | Cell wall/membrane/envelope biogenesis |
| 541616 | 542245 | neuD | neuD protein | R | General function prediction only |
| 542242 | 543396 | neuC | UDP-N-acetylglucosamine-2-epimerase NeuC | M | Cell wall/membrane/envelope biogenesis |
| 543473 | 544498 | neuB | N-acetyl neuramic acid synthetase NeuB | M | Cell wall/membrane/envelope biogenesis |
| 544498 | 545898 | cpsL | polysaccharide biosynthesis protein CpsL | M | Cell wall/membrane/envelope biogenesis |
| 545895 | 546851 | cpsK | polysaccharide biosynthesis protein CpsK | - | - |
| 550496 | 550945 | cpsF | polysaccharide biosynthesis protein CpsF | M | Cell wall/membrane/envelope biogenesis |
| 550969 | 552357 | cpsE | glycosyl transferase CpsE | M | Cell wall/membrane/envelope biogenesis |
| 552370 | 553068 | cpsD | CpsD autokinase | D | Cell cycle control, cell division, chromosome partitioning |
| 553079 | 553771 | cpsC | CpsC protein | M | Cell wall/membrane/envelope biogenesis |
| 553780 | 554511 | cpsB | CpsB phosphatase | T | Signal transduction mechanisms |
| 554517 | 555974 | cpsA | CpsA | M | Cell wall/membrane/envelope biogenesis |
| 577806 | 581024 | hylB | hyaluronidase | - | - |
| 728844 | 729770 | pilC | minor subunit PilC | M | Cell wall/membrane/envelope biogenesis |
| 729767 | 730651 | srtC4 | class C sortase | M | Cell wall/membrane/envelope biogenesis |
| 733841 | 736530 | pilA | tip adhesin PilA | M | Cell wall/membrane/envelope biogenesis |
| 1291377 | 1292144 | cfa/cfb | cAMP factor | - | - |
